# Supplementary material
Source: PubMed Central journal article supplement (PMC2773975)
Supplement: 0902908106_0902908106SI.pdf [file 0902908106_0902908106SI.pdf]

# Supporting Information

Lee and Verdine 10.1073/pnas.0902908106

## SI Text

**Cleavage Assay.** The 16-mer oligonucleotide (5'-TGGTAGA-CATGGACGC-3'; A, substrate adenine) was end-labeled by incubating the substrate adenine-containing single-strand DNA with T4 polynucleotide kinase and [ $\gamma$ - $^{32}$ P]ATP followed by annealing to unlabeled complementary strand (5'-AGCGTCC A °G GTCTACC-3'; °G, 8-oxoguanine) in 100 mM Tris-HCl, pH 8.0, 50 mM NaCl by heating 70 °C for 10 min and slowly cooled to 4 °C. The duplex DNA was then incubated with w.t.

MutY or Glu43Gln MutY at 37 °C for various amounts of time and the reaction was quenched by adding piperidine. The mixture was heated at 90 °C for 30 min to cleave the abasic residue produced by MutY. Samples were analyzed by electrophoresis on a 20% denaturing polyacrylamide gel for 3 h at 300 V. The bands were visualized with a phosphorimaging system after exposing to a Fuji image plate.

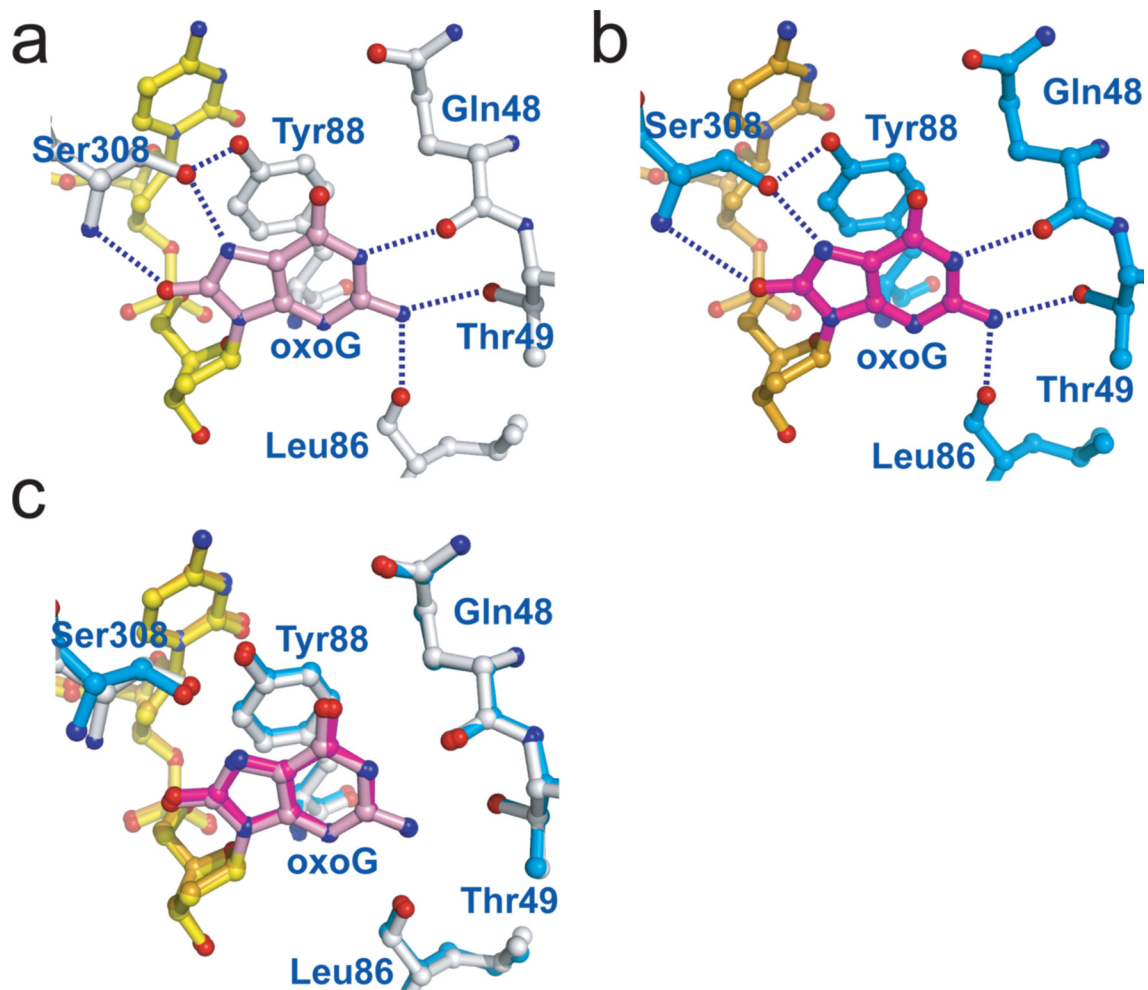

**Fig. S1.** Comparison of oxoG recognition by D144N MutY and *Bst* MutY. (a) Close-up view of oxoG recognition by D144N MutY, colored as in Fig. 3C. OxoG is in pink. Important hydrogen bonding interactions between oxoG lesion and the protein are denoted by dotted lines. (b) Close-up view of oxoG recognition by *Bst* MutY, colored as in Fig. 3D. OxoG is in magenta. (c) Heavy atom superposition of panel A with B. Color scheme as in panel A and B, respectively.

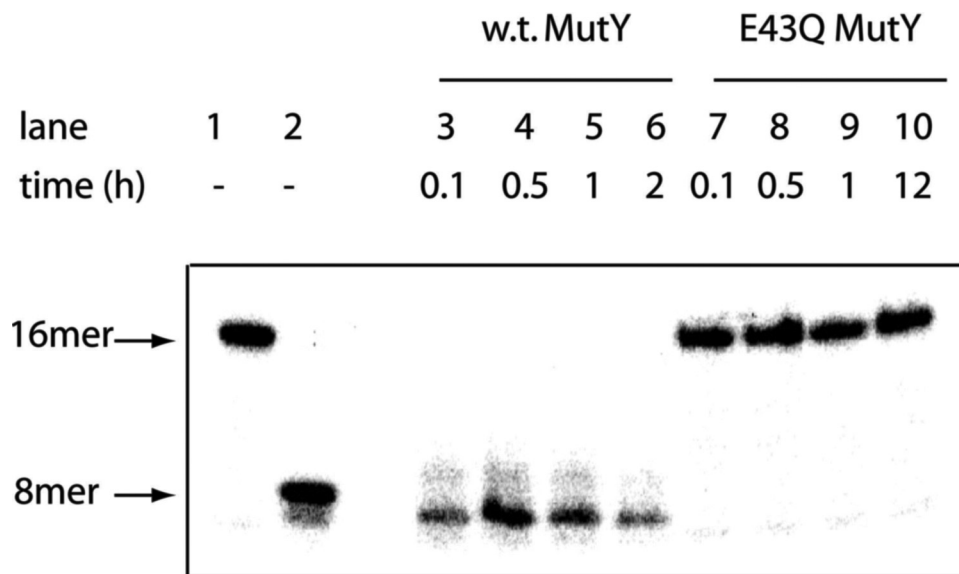

**Fig. S2.** Cleavage assay to detect the processing of substrate adenine-containing 16-mer DNA by w.t. MutY and Glu43Gln MutY. The appearance of the 8-mer product indicates that base-excision has taken place.

Table S1. Data Collection and Refinement Statistics

|                                                         | FdA·oxoG complex                                |
|---------------------------------------------------------|-------------------------------------------------|
| Data collection                                         |                                                 |
| Space group                                             | <i>P2<sub>1</sub>2<sub>1</sub>2<sub>1</sub></i> |
| Cell dimensions                                         |                                                 |
| <i>a</i> , Å                                            | 37.7                                            |
| <i>b</i> , Å                                            | 85.9                                            |
| <i>c</i> , Å                                            | 142.1                                           |
| $\alpha$ , °                                            | 90                                              |
| $\beta$ , °                                             | 90                                              |
| $\gamma$ , °                                            | 90                                              |
| Resolution, Å                                           | 50–2.2                                          |
| <i>R</i> <sub>merge</sub>                               | 0.075 (0.472)                                   |
| <i>I</i> / $\sigma$ <i>I</i>                            | 39.8 (5.7)                                      |
| Completeness, %                                         | 99.9 (100)                                      |
| Redundancy                                              | 6.8 (7.2)                                       |
| Refinement                                              |                                                 |
| Resolution, Å                                           | 50–2.2                                          |
| No. reflections                                         | 18,525                                          |
| <i>R</i> <sub>work</sub> / <i>R</i> <sub>free</sub> , % | 24.6/27.6                                       |
| No. atoms                                               |                                                 |
| Protein                                                 | 2,766                                           |
| Ligand/ion                                              | 445                                             |
| Water                                                   | 49                                              |
| rmsds                                                   |                                                 |
| Bond lengths, Å                                         | 0.009                                           |
| Bond angles, °                                          | 1.1                                             |
| Ramachandran plot, %*                                   |                                                 |
| Most favored region                                     | 84.2                                            |
| Additionally allowed region                             | 14.5                                            |
| Generously allowed region                               | 1.3                                             |

Values in parenthesis refer to the highest resolution shell. \*, calculated using PROCHECK
